# Supplementary material for: The Impact of COVID-19 on Staff Working Practices in UK Horseracing
Source: MDPI journal article supplement (doi:10.3390/ani10112003), 2020-10-30
Supplement: s1 [file s1]

## Questionnaire

☐ Q1. I agree to the terms & conditions of the study, outlined in the pre-questionnaire information above

Q2. Which sector of the racing industry best describes where you work?

|                                                                     |                                                           |                                                 |
|---------------------------------------------------------------------|-----------------------------------------------------------|-------------------------------------------------|
| <input type="radio"/> Training Yard (jump)<br><input type="radio"/> | <input type="radio"/> Jockey                              | <input type="radio"/> Coaching and Education    |
| <input type="radio"/> Training Yard (flat)                          | <input type="radio"/> Trainer                             | <input type="radio"/> Media and Communications  |
| <input type="radio"/> Training Yard (mixed)                         | <input type="radio"/> Racecourse<br><input type="radio"/> | <input type="radio"/> Other, please state _____ |
| <input type="radio"/> Breeding sector                               | <input type="radio"/> Racing Administration               |                                                 |

Q3 Please select your current employment status.

- ☐ Full time
- ☐ Part time
- ☐ Self-employed
- ☐ Other, please state \_\_\_\_\_

Q4 As a result of Covid-19, how secure do you feel your current role is in industry? (i.e. you would still be employed in 3 months' time if you so wished to remain)

|                   |                 |        |                     |                       |
|-------------------|-----------------|--------|---------------------|-----------------------|
| Definitely secure | Probably secure | Unsure | Probably not secure | Definitely not secure |
|-------------------|-----------------|--------|---------------------|-----------------------|

Q5 Are you currently living in accommodation provided by your employer, as part of your role in racing?

- ☐ Yes
- ☐ No
- ☐ Not applicable

**End of Block: Demographics**

---

**Start of Block: Working**

Q6 Are you still actively working at the time of completing this survey?

- ☐ Yes
- ☐ No

*Skip To: End of Block If Q6 = No*

Q7 Please give the reasons you are currently still working e.g. essential worker, horses need care etc.

---

---

---

---

---

---

Q8 How has the Covid-19 pandemic impacted the hours you can work

- ☐ I am working fewer hours than before
- ☐ I am working the same hours as before
- ☐ I am working more hours than before

---

Q9 Have there been any changes to your work environment since the pandemic?

- ☐ Major Changes
- ☐ Minor Changes
- ☐ No Changes

*Skip To: End of Block If Q9 = No Changes*

Q10 What non-riding changes have been made? Please select all that apply.

- ☐ Additional anti-bacterial/hand washing resources available
  - ☐ Limited number of staff working
  - ☐ Distancing measures
  - ☐ Limiting use of shared resources/equipment
  - ☐ Additional cleaning of equipment/shared resources
  - ☐ Other, please state \_\_\_\_\_
- 

Q11 Do you feel these non-riding changes are effective?

- ☐ Extremely effective
- ☐ Very effective
- ☐ Moderately effective
- ☐ Slightly effective
- ☐ Not effective at all

**End of Block: Working**

---

**Start of Block: Horses**

Q12 Are horses still being ridden out at your establishment?

- ☐ Yes
- ☐ No
- ☐ Not applicable to my sector

*Skip To: End of Block If Q12 = No*

*Skip To: End of Block If Q12 = Not applicable to my sector*

Q13 What measures have been taken to facilitate social distancing when riding out? Please select all that apply.

- ☐ Fewer horses per slot
- ☐ Slower work being undertaken
- ☐ Tack cleaned before & after every use
- ☐ Tack cleaned daily
- ☐ Only certain horses currently in work
- ☐ No measures have been taken
- ☐ Other, please state \_\_\_\_\_

Q14 Do you feel these riding changes are effective?

|                     |                |                      |                    |                      |
|---------------------|----------------|----------------------|--------------------|----------------------|
| Extremely effective | Very effective | Moderately effective | Slightly effective | Not effective at all |
|---------------------|----------------|----------------------|--------------------|----------------------|

**End of Block: Horses**

---

**Start of Block: Not Working**

*Display This Question:*

*If Q6 = No*

Q15 Please give the reasons you are not currently working. Please select all that apply.

- ☐ Temporary leave of absence from work - forced
  - ☐ Made redundant
  - ☐ Volunteered not to work
  - ☐ Self-isolation (you are ill)
  - ☐ Self-isolation (family member/dependent ill)
  - ☐ No horses in training
  - ☐ No racing
  - ☐ Other, please state \_\_\_\_\_
-

*Display This Question:*

*If Q6 = No*

Q16 If you are not working, are you still being paid?

- ☐ Yes - 100% of my salary
- ☐ Yes - 80% from government schemes
- ☐ Less than 80%, but some
- ☐ No, I am not being paid

**End of Block: Not Working**

---

**Start of Block: Support**

Q17 Have you accessed any of the following services for support or advice (online or phone) during the Covid-19 pandemic? Please select all you have personally accessed.

- ☐ Racing Welfare
- ☐ Racing's Occupational Health
- ☐ National Association of Racing Staff (NARS)
- ☐ Injured Jockeys Fund (IJF)
- ☐ Professional Jockeys Association (PJA)
- ☐ National Trainers Federation (NTF)
- ☐ British Horseracing Authority (BHA)
- ☐ Other, please state \_\_\_\_\_
- ☐ I have not used any support services

---

Q18 Have you applied for any of the following FINANCIAL support services during the Covid-19 pandemic? Please select all you have personally applied for.

- ☐ Racing Welfare Hardship grants
- ☐ Government financial support (employed)
- ☐ Government financial support (self-employed)
- ☐ Other, please state \_\_\_\_\_
- ☐ I have not used any support services

Q19 What suggestions, if any, do you have for amending current working practice in the horse racing industry during the Covid-19 pandemic?

\_\_\_\_\_

---

---

Q20 If you have any other comments about how Covid-19 has affected your working conditions, please outline them here

---

---

---

**End of Block: Support**

---
